# Supplementary material
Source: MDPI journal article supplement (https://www.mdpi.com/2312-7481/10/6/38)

## Supplementary Materials

# New Branched Iron(III) Complexes in Fluorescent Environment Created by Carbazole Moieties: Synthesis and Structure, Static Magnetic and Resonance Properties

Denis V. Starichenko <sup>1</sup>, Valerya E. Vorobeva <sup>2,3</sup>, Matvey S. Gruzdev <sup>4,\*</sup>, Ulyana V. Chervonova <sup>4</sup>, Nataliya G. Bichan <sup>4</sup>, Aleksander V. Korolev <sup>1</sup> and Ivan V. Yatsyk <sup>2</sup>

<sup>1</sup> M.N. Mikheev Institute of Metal Physics of the Ural Branch of the Russian Academy of Sciences, S. Kovalevskaya Str. 18, 620108 Ekaterinburg, Russia; starichenko@imp.uran.ru (D.V.S.); korolyov@imp.uran.ru (A.V.K.)

<sup>2</sup> Zavoisky Kazan Physical-Technical Institute, Russian Academy of Science, Sibirsky Tract 10/7, 420029 Kazan, Russia; vvalerika@gmail.com (V.E.V.); i.yatzyk@gmail.com (I.V.Y.)

<sup>3</sup> Kazan National Research Technological University, Karl Marx Str. 68, 420015 Kazan, Russia

<sup>4</sup> G.A. Krestov Institute of Solution Chemistry of Russian Academy of Sciences, 153045 Ivanovo, Russia; uch@isc-ras.ru (U.V.C.); bng@isc-ras.ru (N.G.B.)

\* Correspondence: gms@isc-ras.ru (M.S.G.)

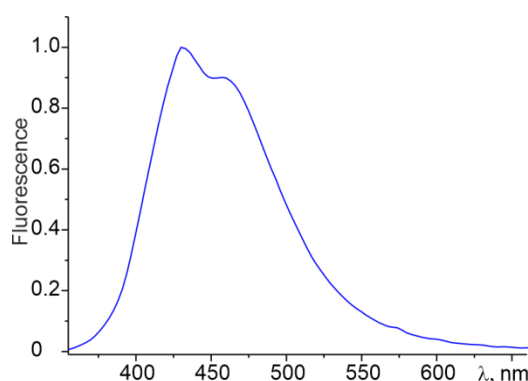

**Figure S1.** Fluorescence spectrum of G2-[L2Fe]PF<sub>6</sub> in the solid state.

**Table S1.** Absorption band maxima in UV–vis spectra of complexes in CH<sub>2</sub>Cl<sub>2</sub>.

| Complex                               | $\lambda_{\text{max1}}$ | $\lambda_{\text{max2}}$ | $\lambda_{\text{max3}}$ | $\lambda_{\text{max4}}$ |
|---------------------------------------|-------------------------|-------------------------|-------------------------|-------------------------|
| G2-[L <sub>2</sub> Fe]NO <sub>3</sub> | 237                     | 297                     | 335                     | 346                     |
| G2-[L <sub>2</sub> Fe]Cl              | 237                     | 297                     | 335                     | 346                     |
| G2-[L <sub>2</sub> Fe]PF <sub>6</sub> | 237                     | 297                     | 335                     | 346                     |

**Table S2.** The time-resolved fluorescence spectroscopy results for complexes in dichloromethane.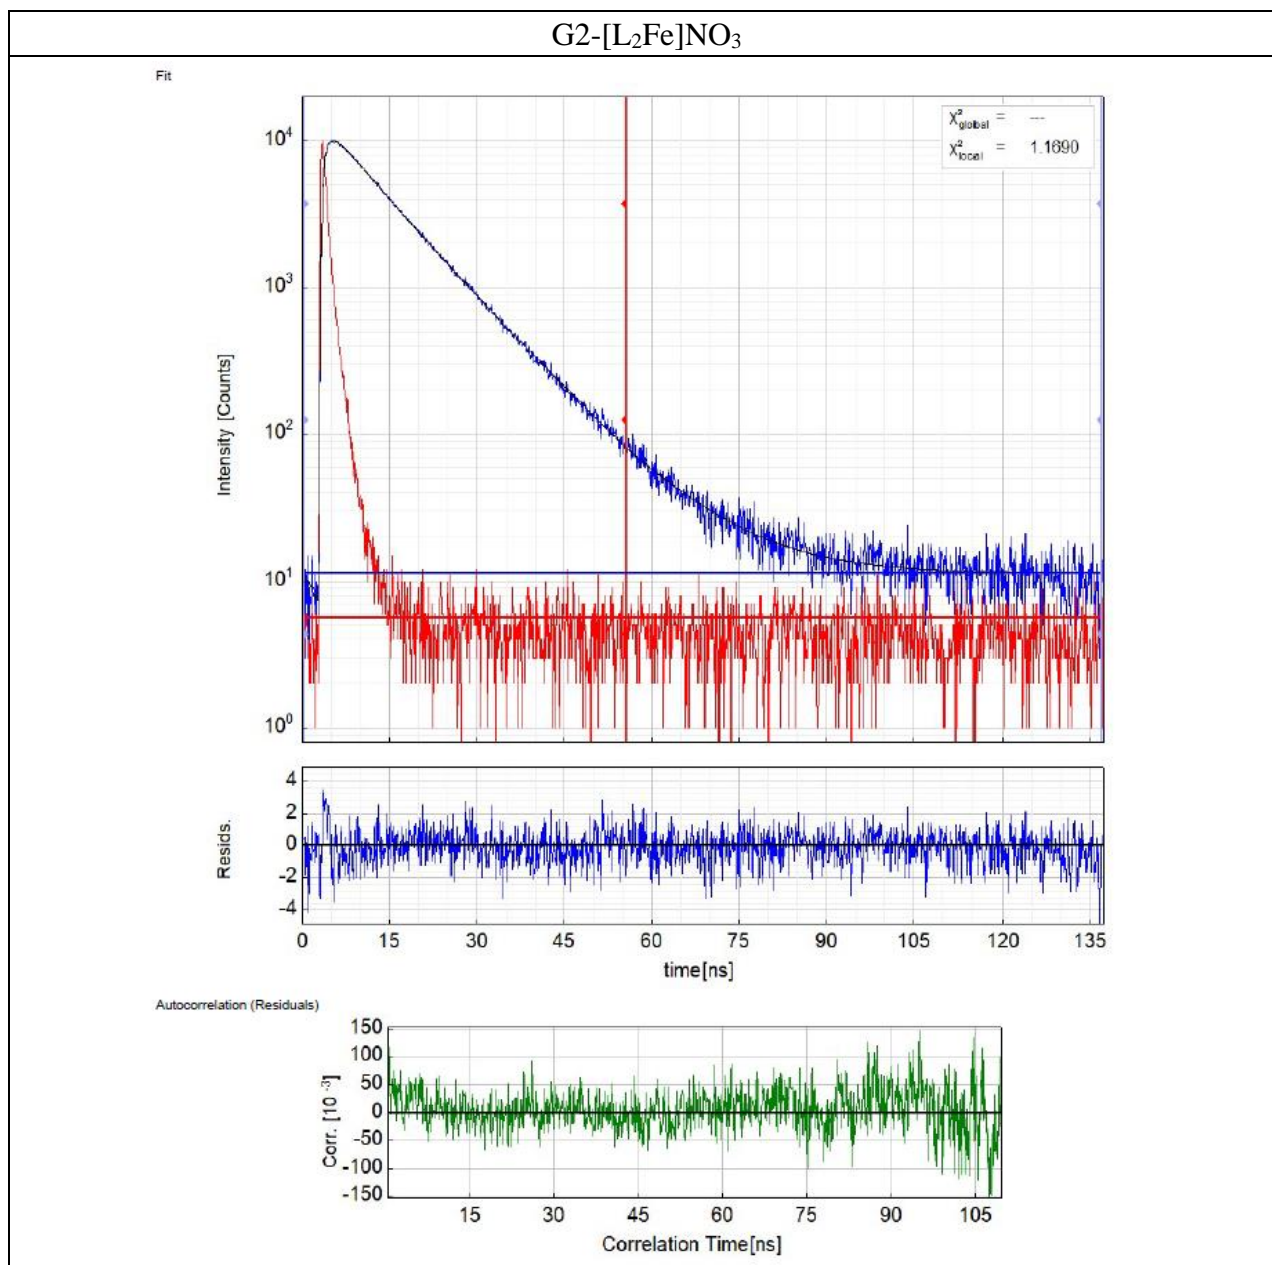

| Parameter                      | Value  | $\Delta$     | $\delta$ |
|--------------------------------|--------|--------------|----------|
| $A_1$ [kCnts/Chnl]             | 7.8    | $\pm 1.8$    | 23%      |
| $\tau_1$ [ns]                  | 11.18  | $\pm 0.53$   | 4.7%     |
| $I_1$ [kCnts]                  | 870    | $\pm 180$    | 17%      |
| $A_2$ [kCnts/Chnl]             | 5.9    | $\pm 1.8$    | 30%      |
| $\tau_2$ [ns]                  | 6.83   | $\pm 0.63$   | 9.2%     |
| $I_2$ [kCnts]                  | 400    | $\pm 180$    | 39%      |
| Bkg <sub>Dec</sub> [kCnts]     | 0.0114 | $\pm 0.0003$ | 2.0%     |
| Bkg <sub>IRF</sub> [Cnts/Chnl] | 5.59   | $\pm 0.34$   | 5.9%     |
| Shift <sub>IRF</sub> [ps]      | -9.9   | $\pm 2.8$    | 28%      |
| $\tau_{\text{avint}}$ [ns]     | 9.806  | $\pm 0.051$  | 0.5%     |

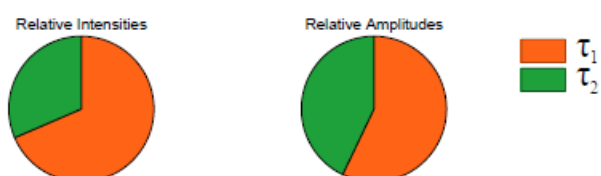G2-[L<sub>2</sub>Fe]Cl

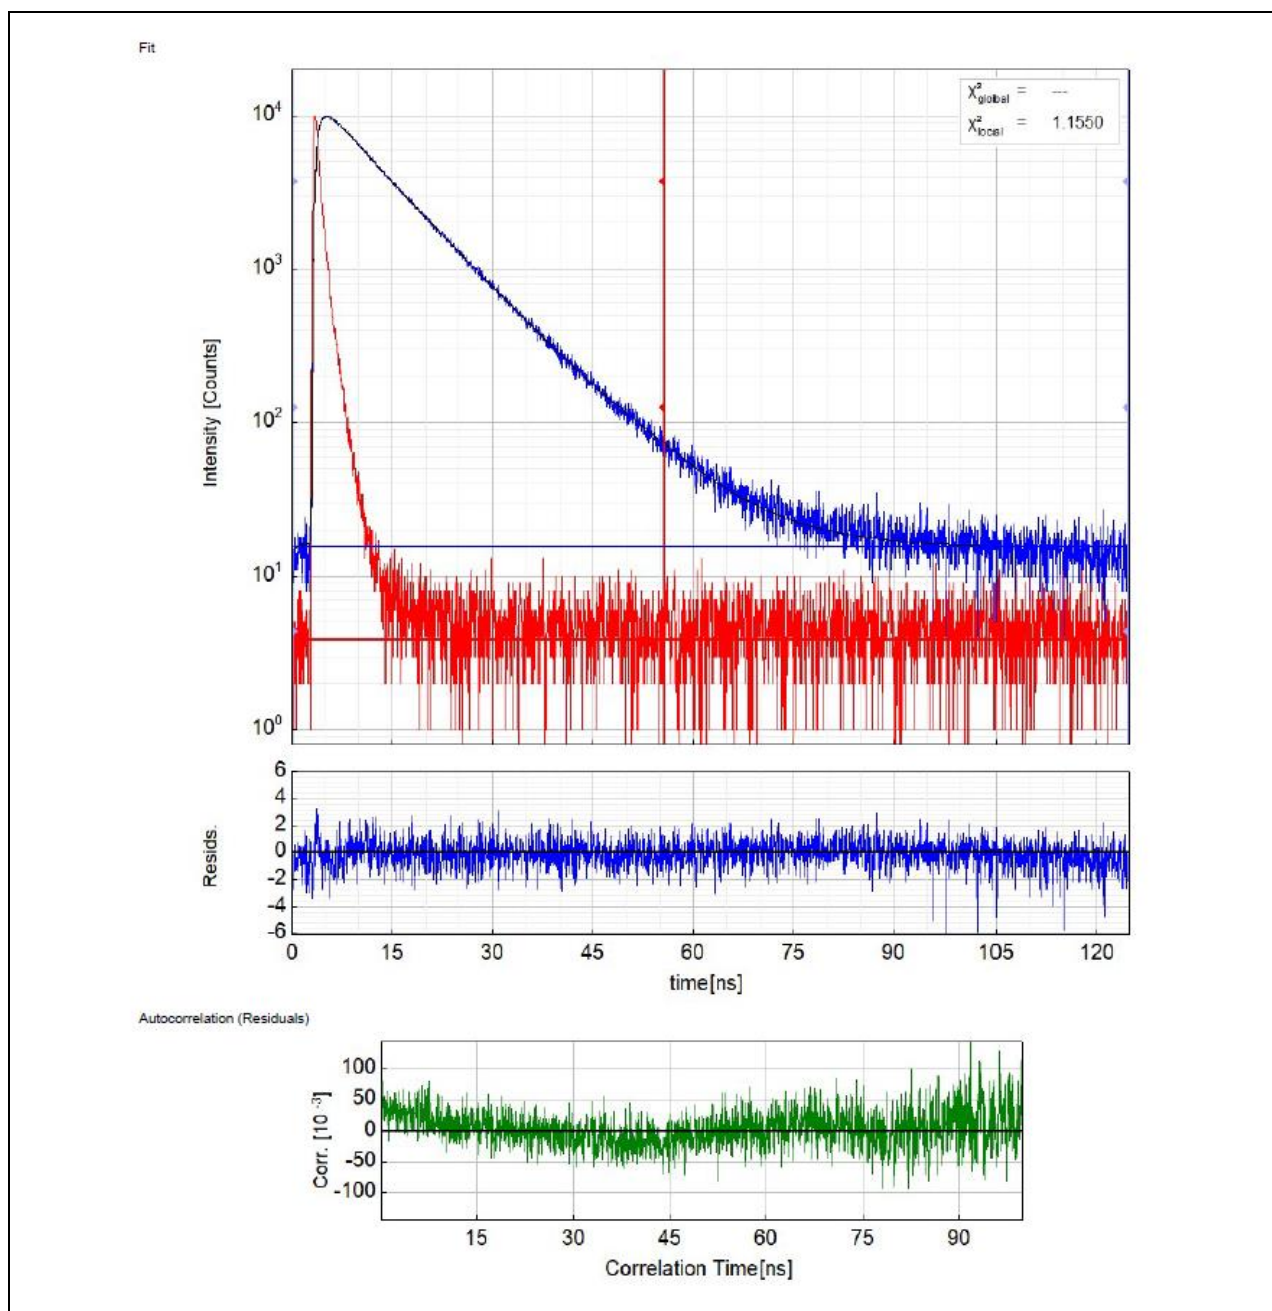

| Parameter                      | Value  | $\Delta$     | $\delta$ |
|--------------------------------|--------|--------------|----------|
| $A_1$ [kCnts/Chnl]             | 2.26   | $\pm 0.12$   | 5.0%     |
| $\tau_1$ [ns]                  | 2.85   | $\pm 0.54$   | 19%      |
| $I_1$ [kCnts]                  | 129    | $\pm 26$     | 20%      |
| $A_2$ [kCnts/Chnl]             | 11.71  | $\pm 0.21$   | 1.8%     |
| $\tau_2$ [ns]                  | 9.441  | $\pm 0.072$  | 0.8%     |
| $I_2$ [kCnts]                  | 2 210  | $\pm 24$     | 1.1%     |
| Bkg <sub>Dec</sub> [kCnts]     | 0.0155 | $\pm 0.0002$ | 0.6%     |
| Bkg <sub>IRF</sub> [Cnts/Chnl] | 3.84   | $\pm 0.21$   | 5.4%     |
| Shift <sub>IRF</sub> [ps]      | -36.7  | $\pm 2.7$    | 7.2%     |
| $\tau_{\text{Avint}}$ [ns]     | 9.079  | $\pm 0.025$  | 0.3%     |

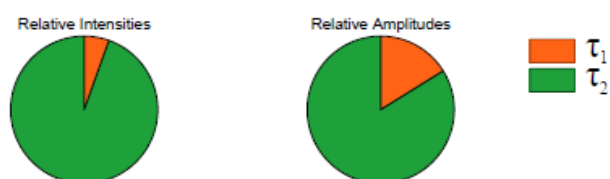G2-[L<sub>2</sub>Fe]PF<sub>6</sub>

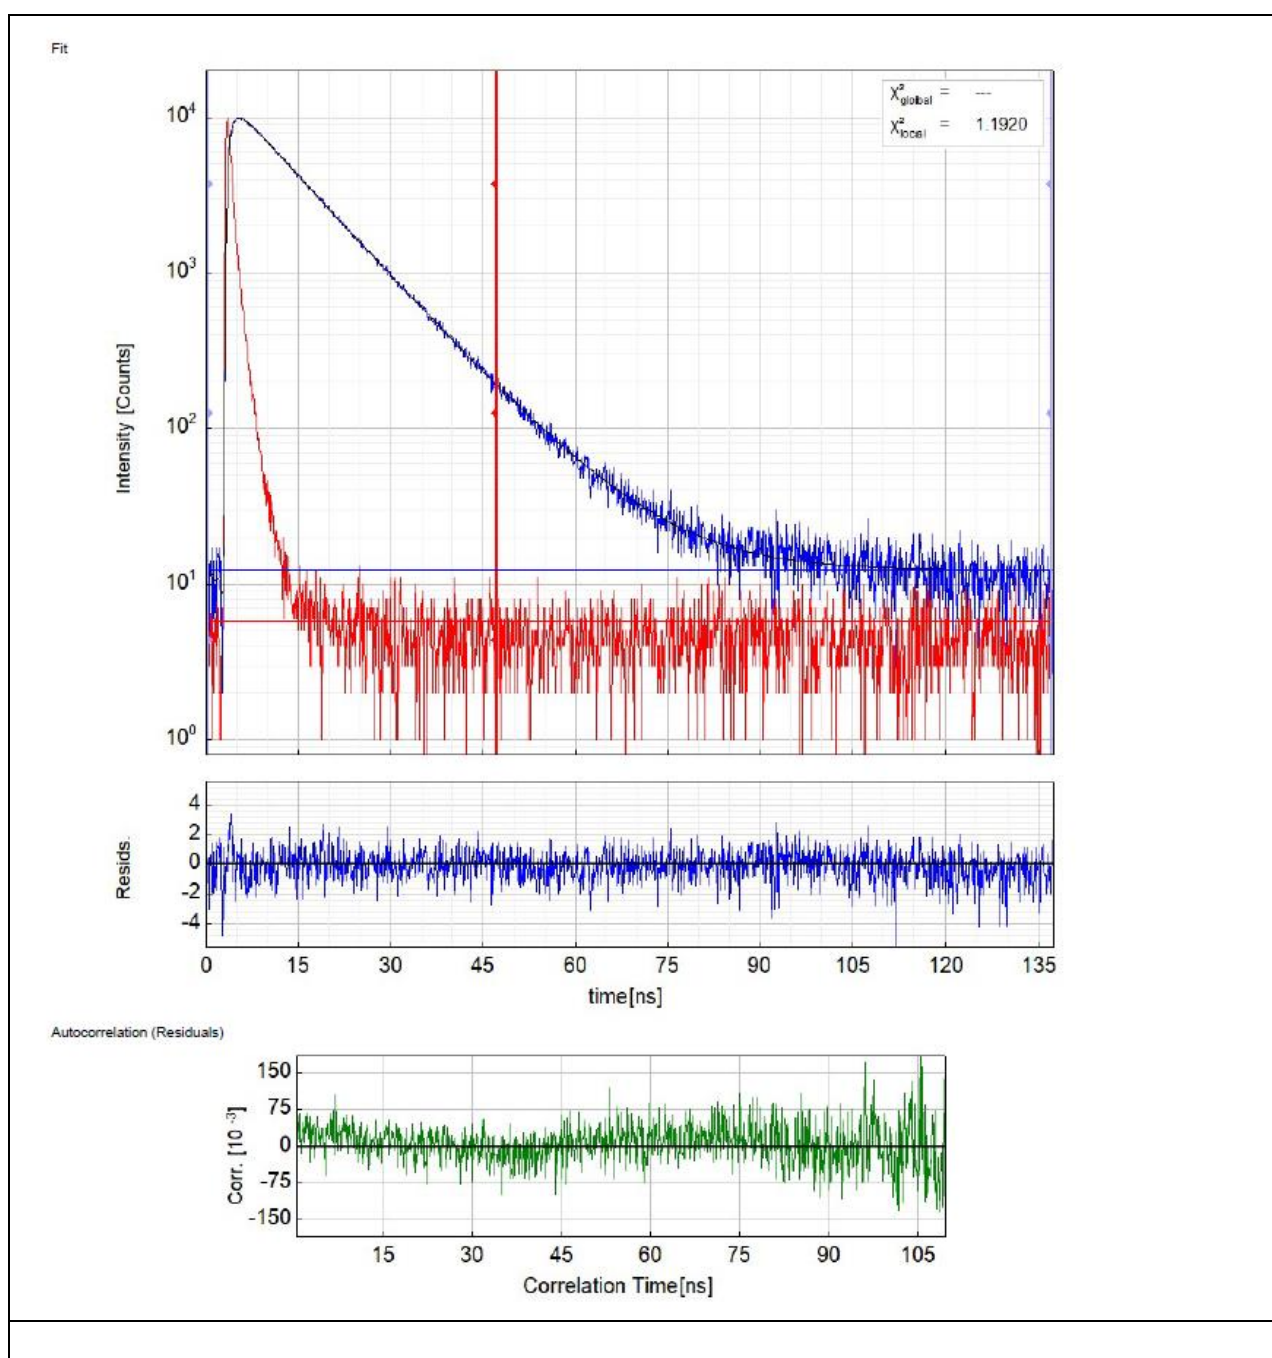

| Parameter                 | Value  | $\Delta$     | $\delta$ |
|---------------------------|--------|--------------|----------|
| $A_1$ [kCnts/Chnl]        | 2.77   | $\pm 0.86$   | 31%      |
| $\tau_1$ [ns]             | 6.49   | $\pm 0.91$   | 14%      |
| $I_1$ [kCnts]             | 180    | $\pm 89$     | 49%      |
| $A_2$ [kCnts/Chnl]        | 10.45  | $\pm 0.93$   | 8.9%     |
| $\tau_2$ [ns]             | 10.69  | $\pm 0.16$   | 1.4%     |
| $I_2$ [kCnts]             | 1 117  | $\pm 94$     | 8.4%     |
| Bkgroed[kCnts]            | 0.0124 | $\pm 0.0002$ | 1.4%     |
| Bkgnois[Cnts/Chnl]        | 5.71   | $\pm 0.33$   | 5.7%     |
| Shift <sub>ref</sub> [ps] | -10.3  | $\pm 1.8$    | 17%      |
| $\tau_{Aver}$ [ns]        | 10.109 | $\pm 0.023$  | 0.2%     |

Relative Intensities

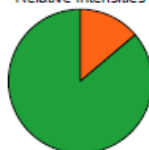

Relative Amplitudes

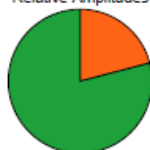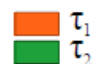

Supplement: s1 [file s1]
